# Supplementary material for: Study of paraCEST response on six-coordinated Co(ii) and Ni(ii) complexes of a pyridine-tetraamide-based ligand
Source: Royal Society of Chemistry journal article supplement (doi:10.1039/d3dt02283h), 2023-01-01
Supplement: d3dt02283h1.pdf [file d3dt02283h1.pdf]

## Supporting Information

### **Study of paraCEST response on six-coordinated Co(II) and Ni(II) complexes of a pyridine-tetraamide-based ligand**

Suvam Kumar Panda, Ankit Rai, and Akhilesh Kumar Singh\*

Indian Institute of Technology Bhubaneswar, Khordha, Odisha, India, Pin-752050.

#### **Contents:**

1. **Fig. S1.**  $^1\text{H}$  NMR (400 MHz) of compound **7** in  $\text{CDCl}_3$  (\* mark indicates the residual peak of the solvent).
2. **Fig. S2.**  $^{13}\text{C}$  NMR (100 MHz) of compound **7** in  $\text{CDCl}_3$  (\* mark indicates the residual peak of the solvent).
3. **Fig. S3.**  $^1\text{H}$  NMR (400 MHz) of PATA in  $\text{DMSO-d}_6$  (\* mark indicates the residual peak of the solvent).
4. **Fig. S4.**  $^{13}\text{C}$  NMR (100 MHz) of PATA in  $\text{DMSO-d}_6$  (\* mark indicates the residual peak of the solvent).
5. **Fig. S5.** HRMS spectrum of the compound **7**.
6. **Fig. S6.** HRMS spectrum of the ligand PATA.
7. **Fig. S7.** HRMS spectrum of  $[\text{Co}(\text{PATA})]^{2+}$ .
8. **Fig. S8.** HRMS spectrum of  $[\text{Ni}(\text{PATA})]^{2+}$ .
9. **Fig. S9.** FT-IR Spectra of PATA at ambient temperature in KBr pellet.
10. **Fig. S10.** FT-IR Spectra of  $[\text{Co}(\text{PATA})]^{2+}$  at ambient temperature in KBr pellet.
11. **Fig. S11.** FT-IR Spectra of  $[\text{Ni}(\text{PATA})]^{2+}$  at ambient temperature in KBr pellet.
12. **Fig. S12.** Detection of exchangeable protons bound to the Co(II) ion in the  $[\text{Co}(\text{PATA})]^{2+}$  complex using 400 MHz  $^1\text{H}$  NMR (inset represents the aliphatic region and \* mark indicates the bound amide protons).
13. **Fig. S13.** Temperature variation  $^1\text{H}$  NMR spectra of  $[\text{Co}(\text{PATA})]^{2+}$  complex in  $\text{D}_2\text{O}$  solvent.
14. **Fig. S14.** Variable pH  $^1\text{H}$  NMR of complex  $[\text{Co}(\text{PATA})]^{2+}$  in water solvent with 20 mM HEPES and 100 mM NaCl. All spectra were recorded at 37 °C and  $\text{D}_2\text{O}$  containing sealed capillary was used for locking purposes.

15. **Fig. S15.**  $^1\text{H}$  NMR metal dissociation studies of the  $[\text{Co}(\text{PATA})]^{2+}$  complex in the presence of  $\text{Zn}^{2+}$  ions (a) full range spectra and (b) aliphatic regions at 0 h, 12 h, and 24 h. The spectra were recorded in  $\text{D}_2\text{O}$  solvent, maintaining a pD of nearly 7.4.
16. **Fig. S16.** Detection of exchangeable protons bound to the Ni(II) ion in the  $[\text{Ni}(\text{PATA})(\text{OH}_2)]^{2+}$  complex using 400 MHz  $^1\text{H}$  NMR (inset represents the aliphatic region and \* mark indicates the bound amide protons).
17. **Fig. S17.** CEST spectra of the complex  $[\text{Ni}(\text{PATA})(\text{OH}_2)]^{2+}$  (10 mM) with 20 mM HEPES buffer and 100 mM NaCl at 37 °C by maintaining a pH value of 7.4. The experiment was carried out at 25  $\mu\text{T}$  with a 4 s presaturation pulse.
18. **Fig. S18.** Variable-pH magnetic moment data for the metal complex  $[\text{Co}(\text{PATA})]^{2+}$  in an aqueous medium containing 20 mM HEPES and 100 mM NaCl was obtained with the help of Evans' method.  $^1\text{H}$  NMR of all the samples was recorded at 37 °C.
19. **Fig. S19.** UV spectra of PATA,  $[\text{Co}(\text{PATA})]^{2+}$ , and  $[\text{Ni}(\text{PATA})(\text{OH}_2)]^{2+}$ , recorded at 30  $\mu\text{M}$  concentration in an aqueous medium containing 20 mM HEPES and 100 mM NaCl at room temperature.
20. **Fig. S20.** UV-Vis spectra of  $[\text{Co}(\text{PATA})]^{2+}$ , and  $[\text{Ni}(\text{PATA})(\text{OH}_2)]^{2+}$ , recorded at 10 mM concentration in an aqueous medium containing 20 mM HEPES and 100 mM NaCl at room temperature.
21. **Fig. S21.** Metal displacement reaction of the  $[\text{Co}(\text{PATA})]^{2+}$  complex with competing Cu(II) ions, monitored for 8 hours at 260 nm. Samples containing 50  $\mu\text{M}$   $[\text{Co}(\text{PATA})]^{2+}$  with 1, 2, and 5 equivalent ratios of  $\text{CuCl}_2$  salt in aqueous solutions containing 20 mM HEPES and 100 mM NaCl buffered at pH 7.4. A 50  $\mu\text{M}$   $[\text{Cu}(\text{PATA})]^{2+}$  sample is present to determine the absorbance of a 100% dissociation.
22. **Fig. S22.** UV-Vis kinetic study of the complex  $[\text{Co}(\text{PATA})]^{2+}$  at 260 nm in acidic conditions, pH 4, and in the presence of competing anions, 25 mM  $\text{K}_2\text{CO}_3$  and 0.4 mM  $\text{K}_2\text{HPO}_4$ .
23. **Fig. S23.** Cyclic voltammogram of  $[\text{Co}(\text{PATA})]^{2+}$  complex at glassy carbon electrode in  $\text{H}_2\text{O}$  solvent/ 0.1 M KCl, reference electrode-  $\text{Ag}/\text{Ag}^+$  at scan rate 100 mV/s.
24. **Table S1.** Selected bond length and bond angles of the PATA-Co complex.

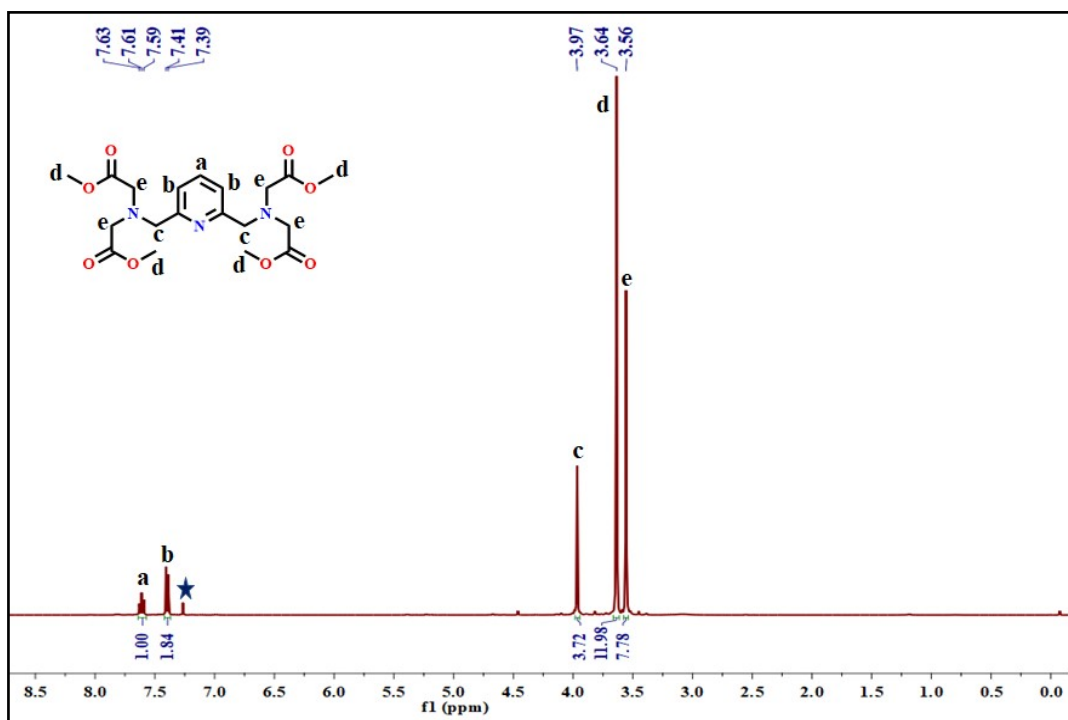

**Fig. S1.** <sup>1</sup>H NMR (400 MHz) of compound **7** in CDCl<sub>3</sub> (\* mark indicates the residual peak of the solvent).

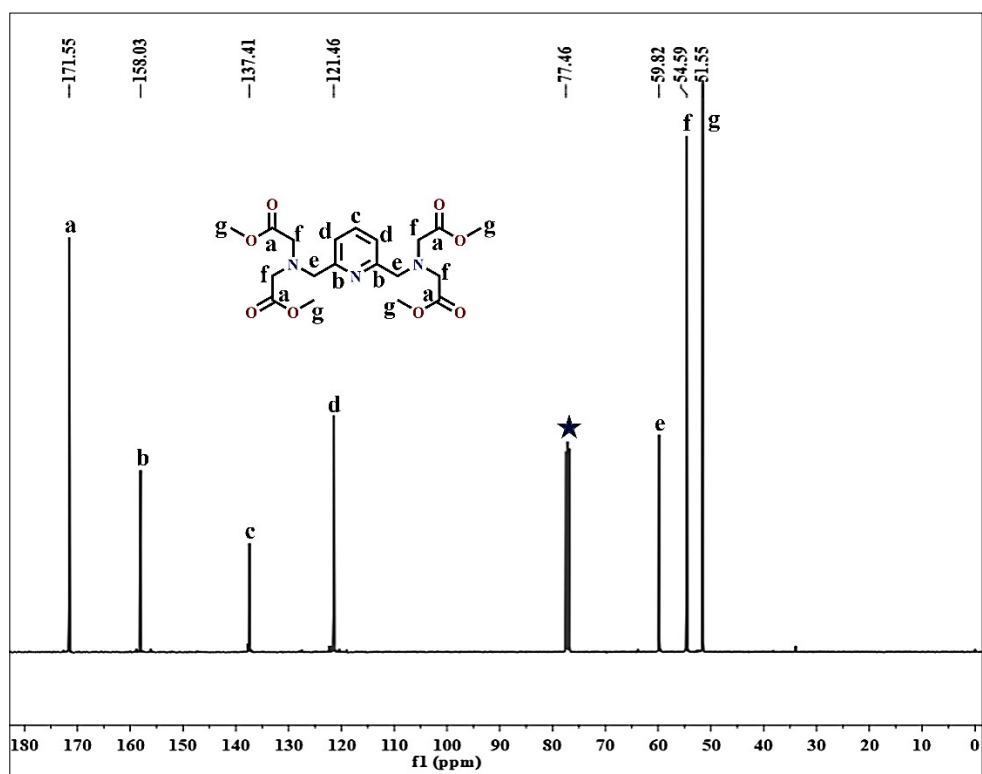

**Fig. S2.**  $^{13}\text{C}$  NMR (100 MHz) of compound 7 in  $\text{CDCl}_3$  (\* mark indicates the residual peak of the solvent).

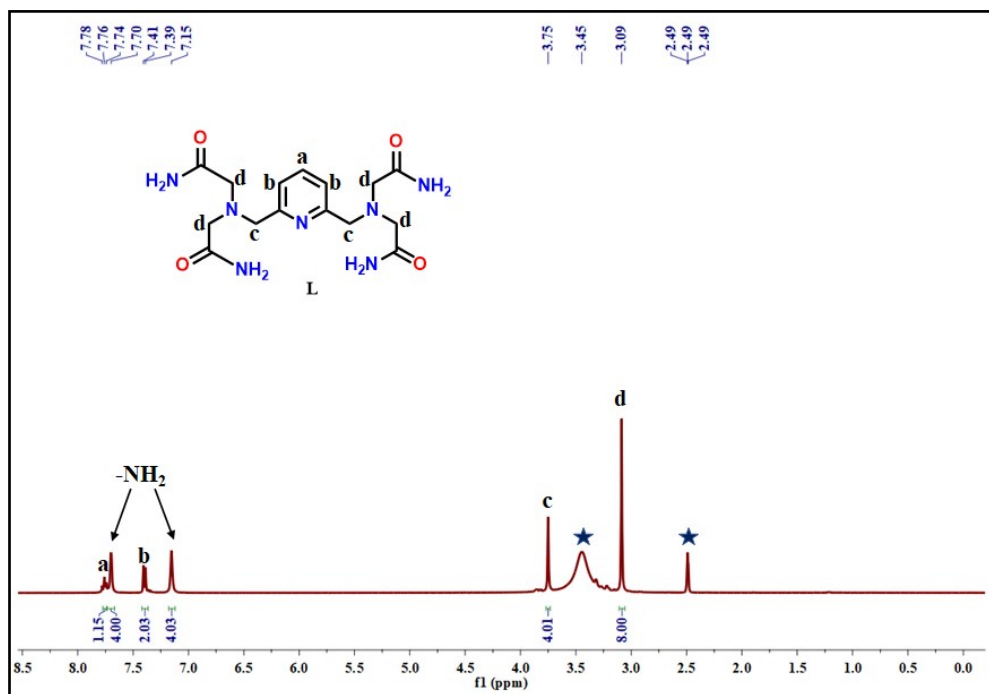

**Fig. S3.**  $^1\text{H}$  NMR (400 MHz) of PATA in  $\text{DMSO-d}_6$  (\* mark indicates the residual peak of the solvent).

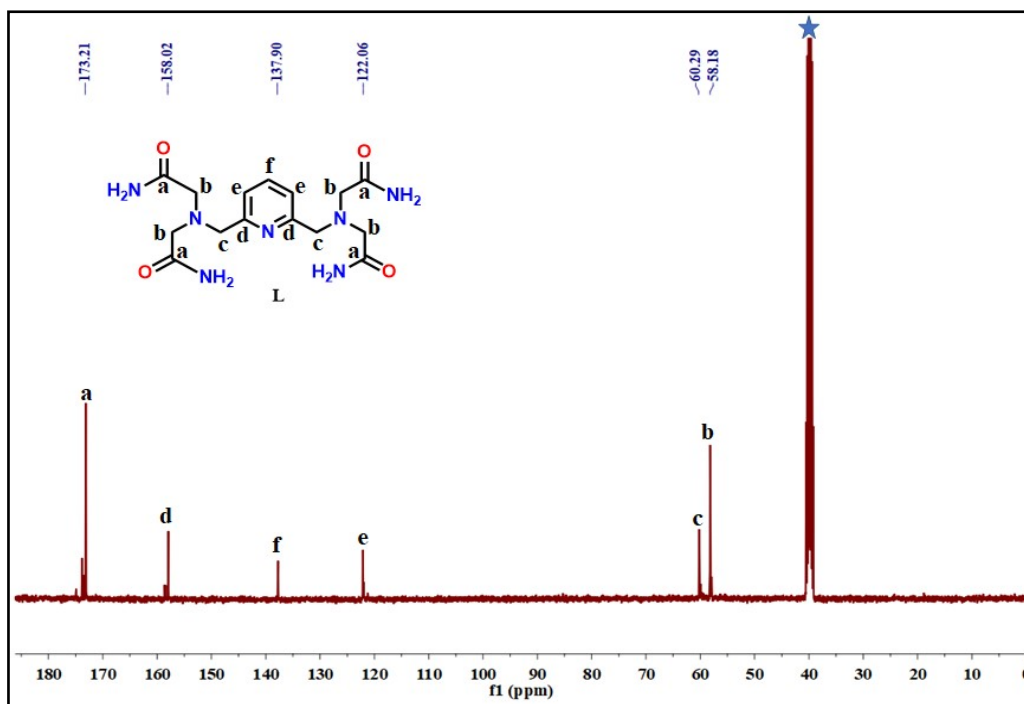

**Fig. S4.**  $^{13}\text{C}$  NMR (100 MHz) of PATA in  $\text{DMSO-d}_6$  (\* mark indicates the residual peak of the solvent).

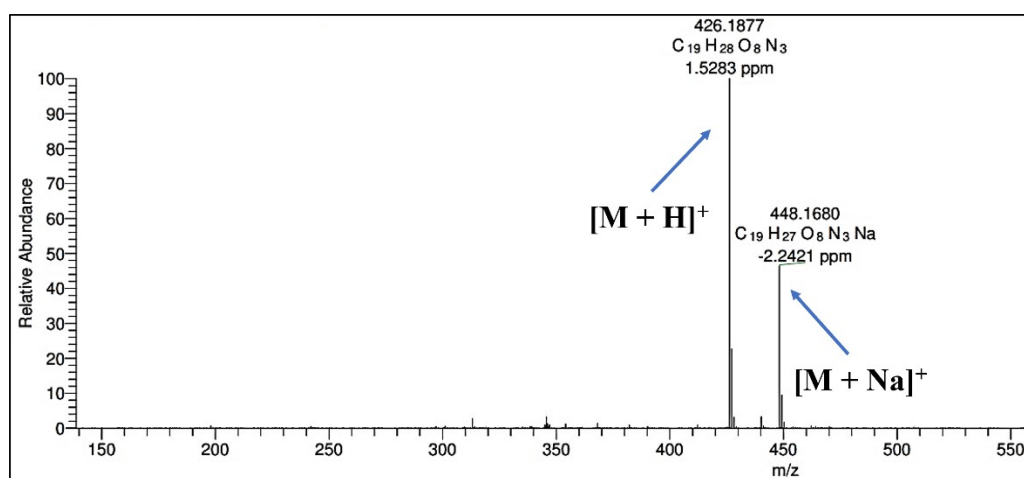

**Fig. S5.** HRMS spectrum of the compound 7.

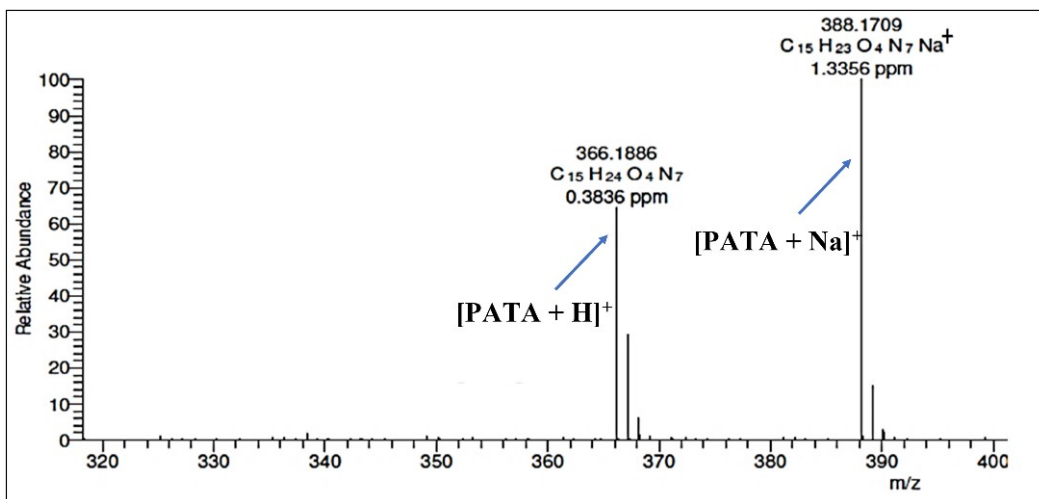

Fig. S6. HRMS spectrum of the ligand PATA.

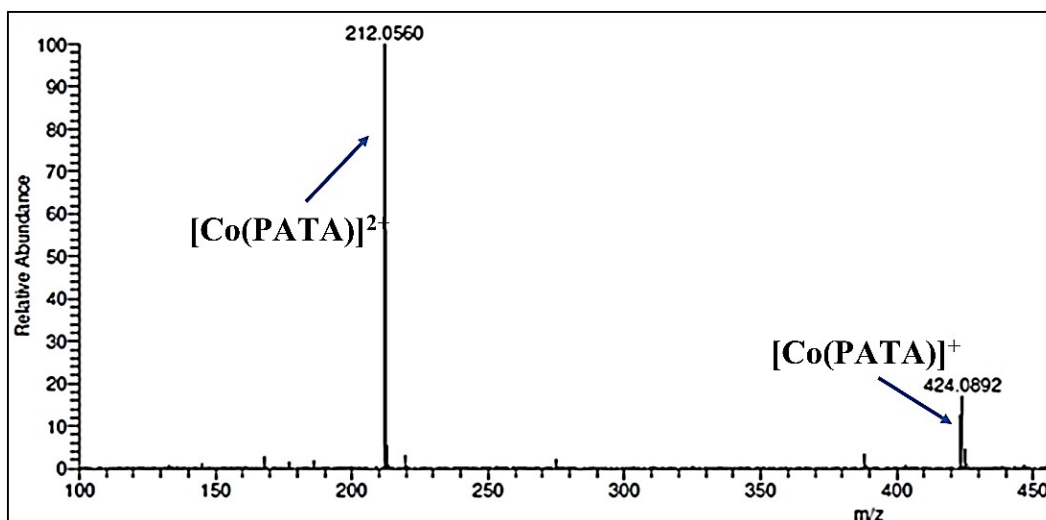

Fig. S7. HRMS spectrum of  $[Co(PATA)]^{2+}$ .

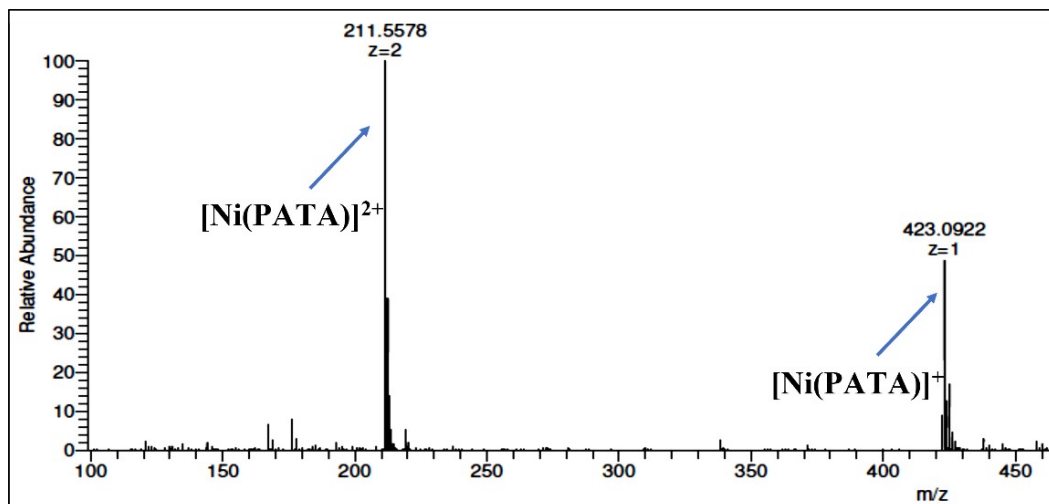

**Fig. S8.** HRMS spectrum of  $[\text{Ni}(\text{PATA})]^{2+}$ .

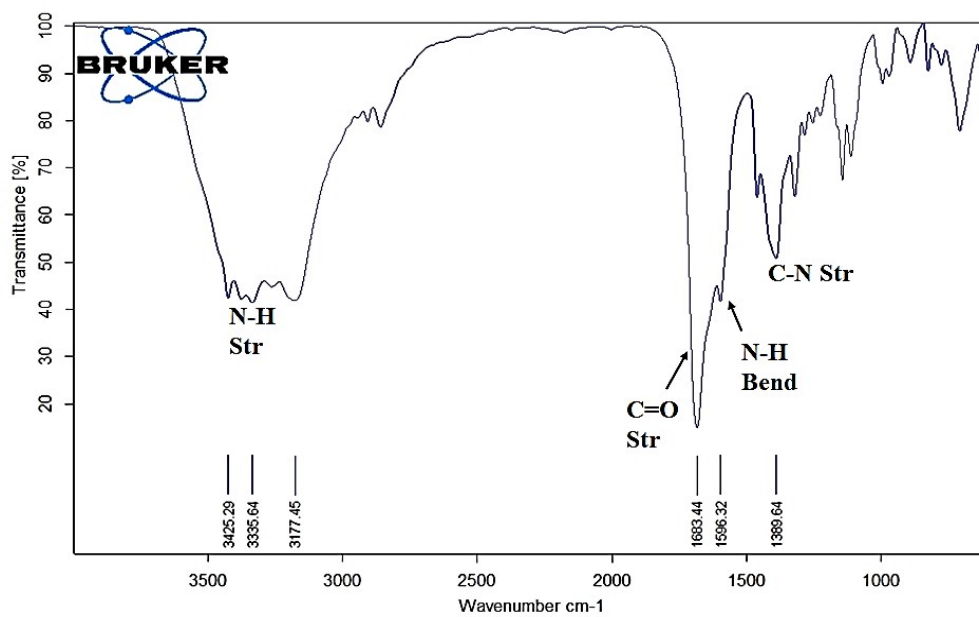

**Fig. S9.** FT-IR spectrum of PATA at ambient temperature in KBr pellet.

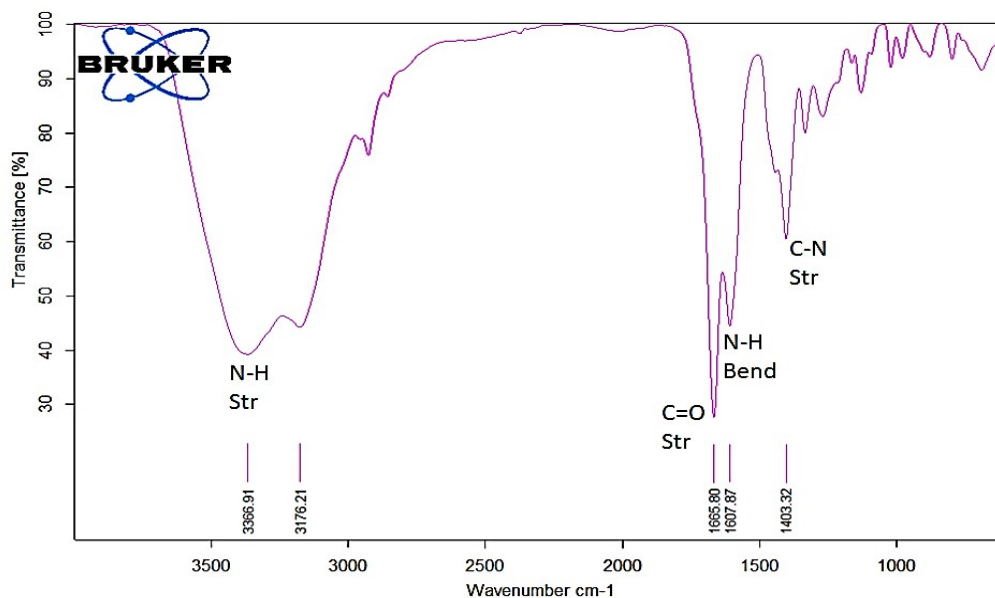

**Fig. S10.** FT-IR spectrum of  $[\text{Co}(\text{PATA})]^{2+}$  at ambient temperature in KBr pellet.

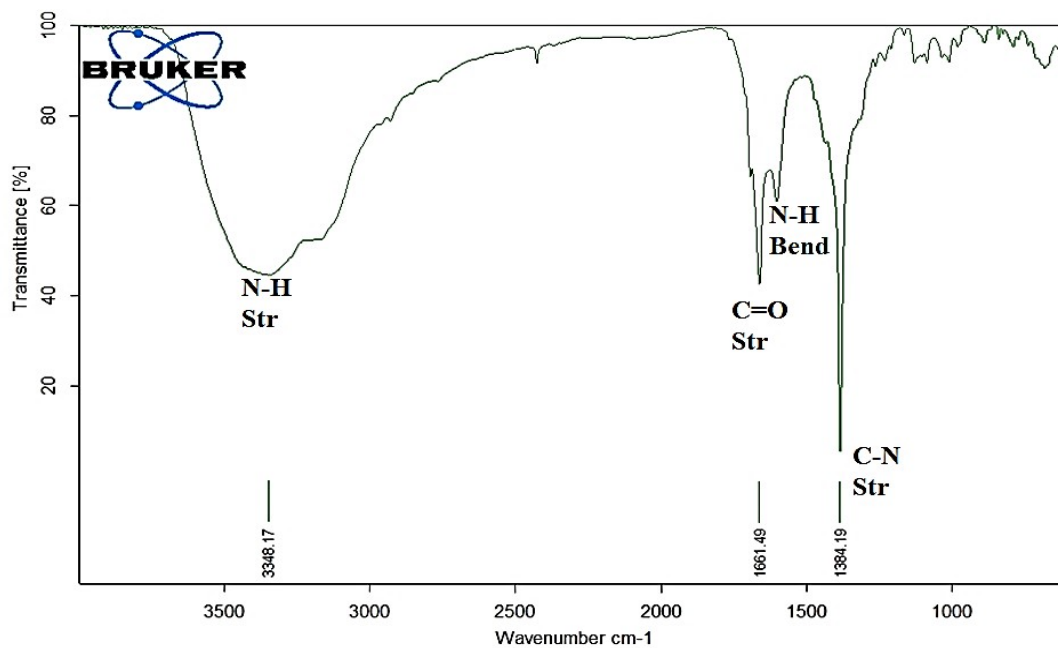

**Fig. S11.** FT-IR spectrum of  $[\text{Ni}(\text{PATA})]^{2+}$  at ambient temperature in KBr pellet.

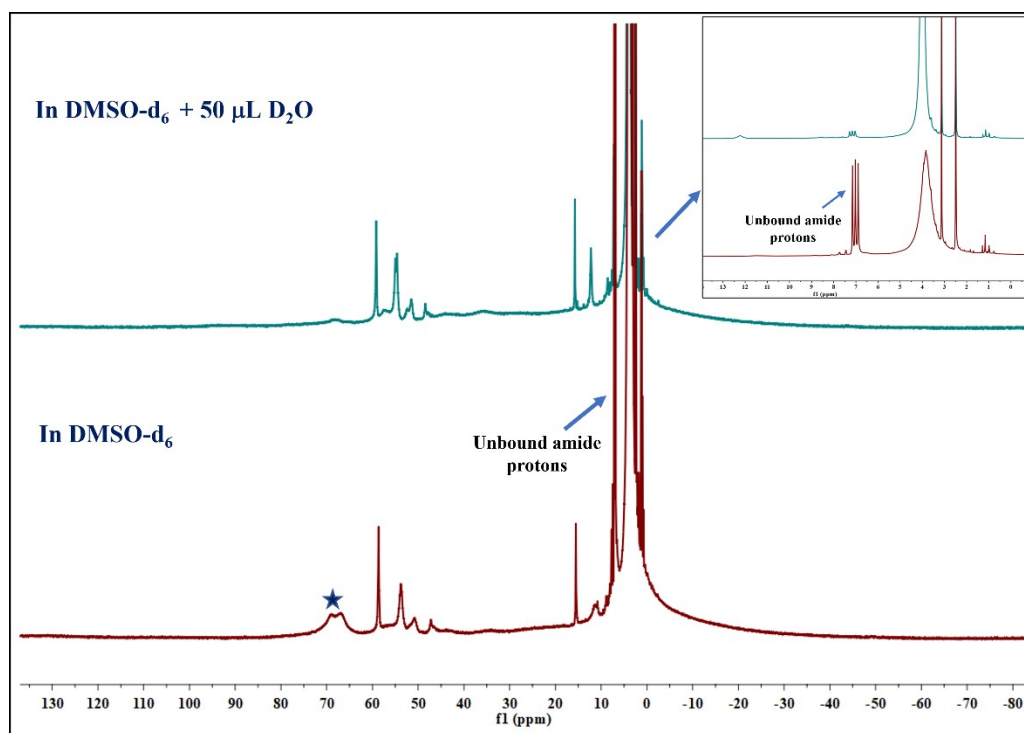

**Fig. S12.** Detection of exchangeable protons bound to the Co(II) ion in the  $[\text{Co}(\text{PATA})]^{2+}$  complex using 400 MHz  $^1\text{H}$  NMR (inset represents the aliphatic region and \* mark indicates the bound amide protons).



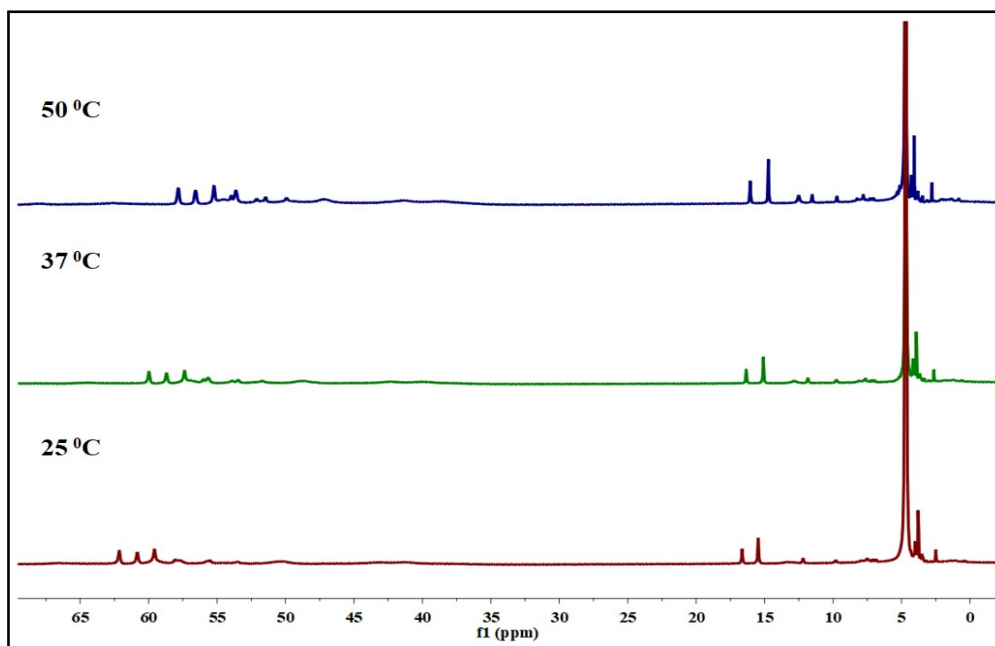

**Fig. S13.** Temperature variation  $^1\text{H}$  NMR spectra of  $[\text{Co}(\text{PATA})]^{2+}$  complex in  $\text{D}_2\text{O}$  solvent.

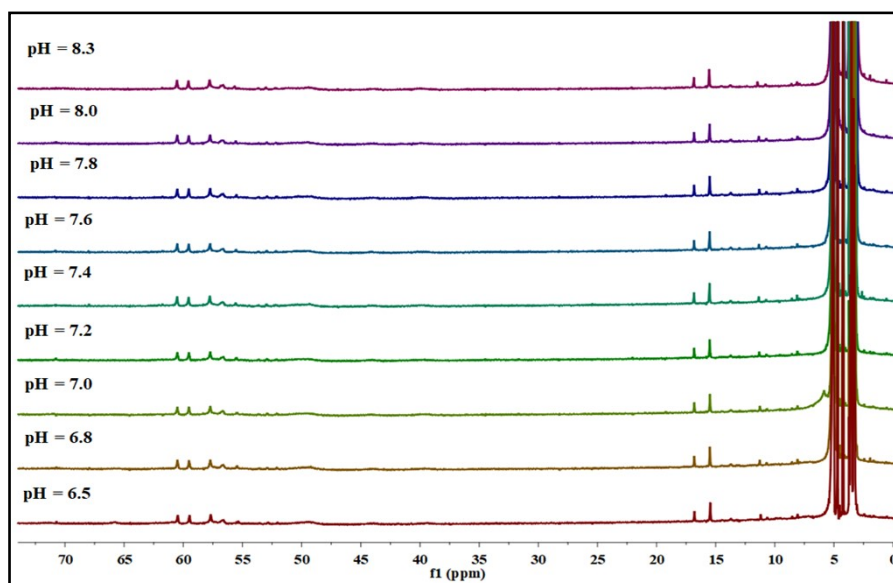

**Fig. S14.** Variable pH  $^1\text{H}$  NMR of complex  $[\text{Co}(\text{PATA})]^{2+}$  in water solvent with 20 mM HEPES and 100 mM NaCl. All spectra were recorded at 37 °C and  $\text{D}_2\text{O}$  containing sealed capillary was used for locking purposes.

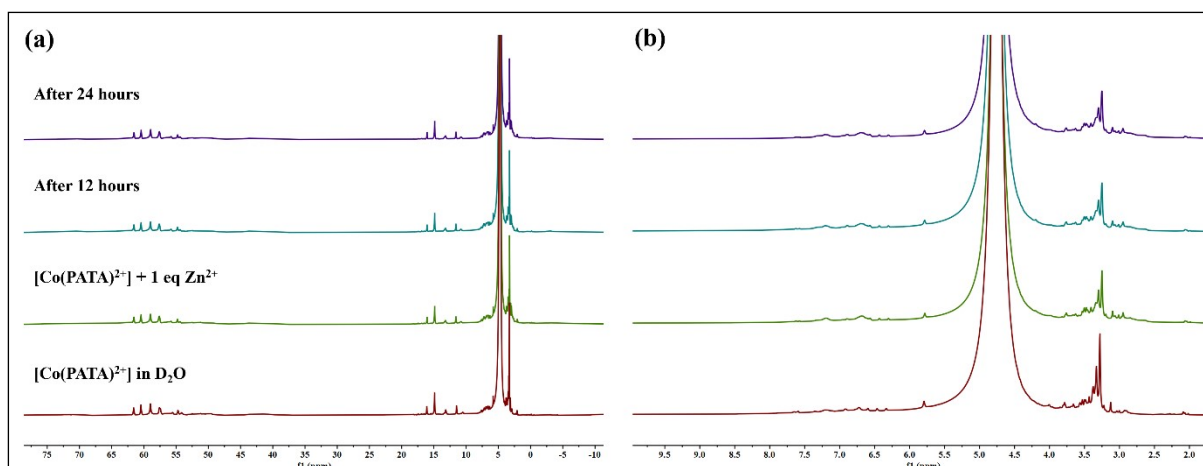

**Fig. S15.**  $^1\text{H}$  NMR metal dissociation studies of the  $[\text{Co}(\text{PATA})]^{2+}$  complex in the presence of  $\text{Zn}^{2+}$  ions (a) full range spectra and (b) aliphatic regions at 0 h, 12 h, and 24 h. The spectra were recorded in  $\text{D}_2\text{O}$  solvent, maintaining a pD of nearly 7.4.

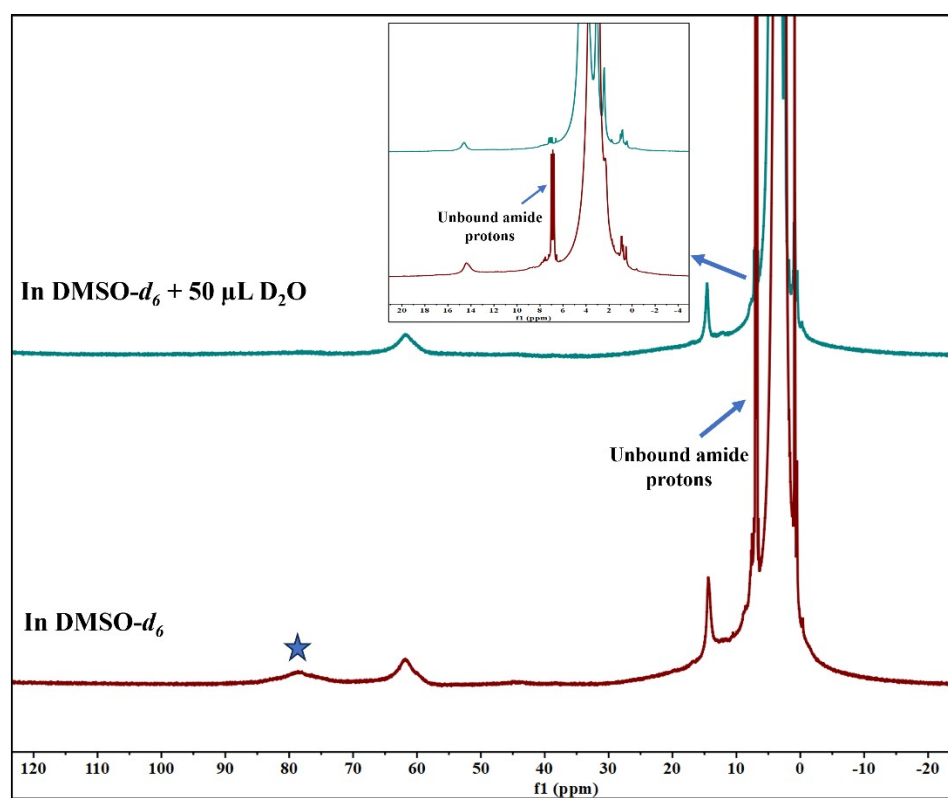

**Fig. S16.** Detection of exchangeable protons bound to the Ni(II) ion in the  $[\text{Ni}(\text{PATA})(\text{OH}_2)]^{2+}$  complex using 400 MHz  $^1\text{H}$  NMR (inset represents the aliphatic region and \* mark indicates the bound amide protons).

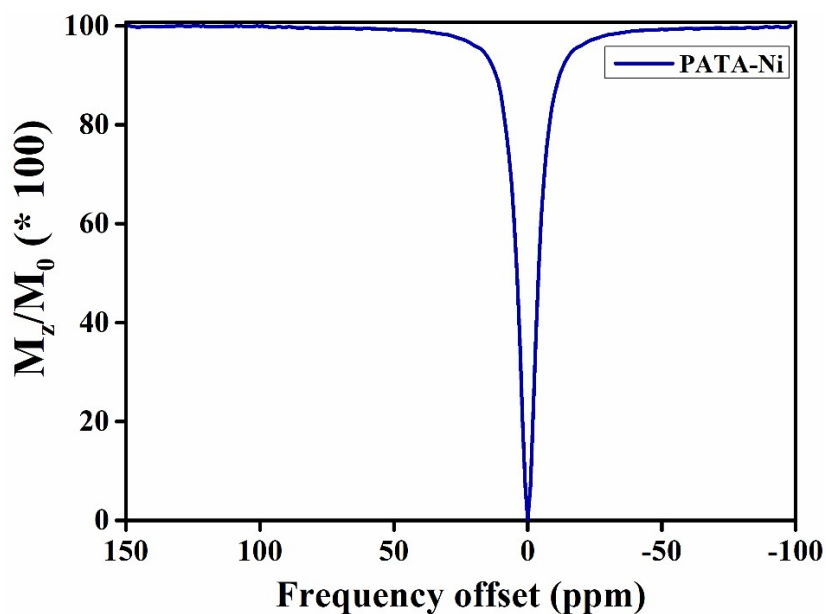

**Fig. S17.** CEST spectra of the complex  $[\text{Ni}(\text{PATA})(\text{OH}_2)]^{2+}$  (10 mM) with 20 mM HEPES buffer and 100 mM NaCl at 37 °C by maintaining a pH value of 7.4. The experiment was carried out at 25  $\mu\text{T}$  with a 4 s presaturation pulse.

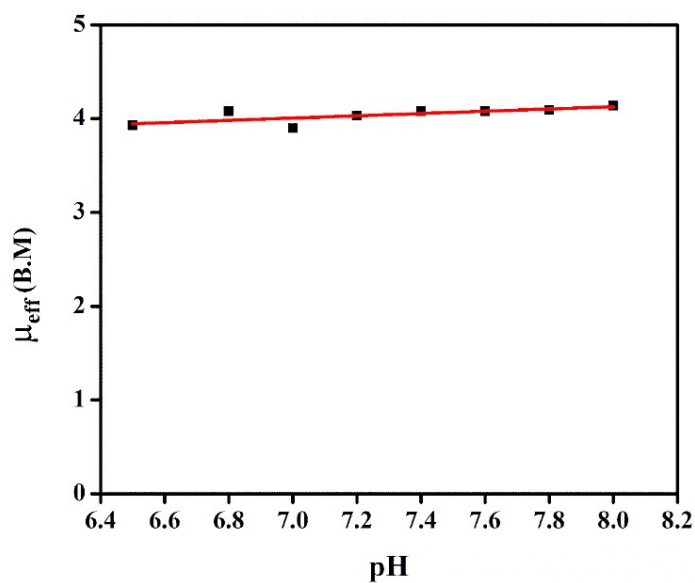

**Fig. S18.** Variable-pH magnetic moment data for the metal complex  $[\text{Co}(\text{PATA})]^{2+}$  in an aqueous medium containing 20 mM HEPES and 100 mM NaCl was obtained with the help of Evans' method. <sup>1</sup>H NMR of all the samples was recorded at 37 °C.

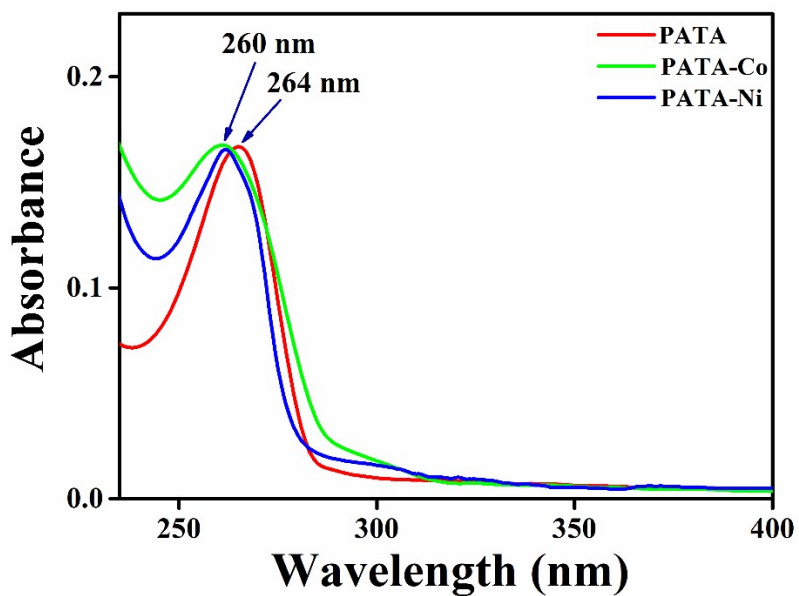

**Fig. S19.** UV spectra of PATA,  $[\text{Co}(\text{PATA})]^{2+}$ , and  $[\text{Ni}(\text{PATA})]^{2+}$ , recorded at  $30 \mu\text{M}$  concentration in an aqueous medium containing  $20 \text{ mM}$  HEPES and  $100 \text{ mM}$  NaCl at room temperature.

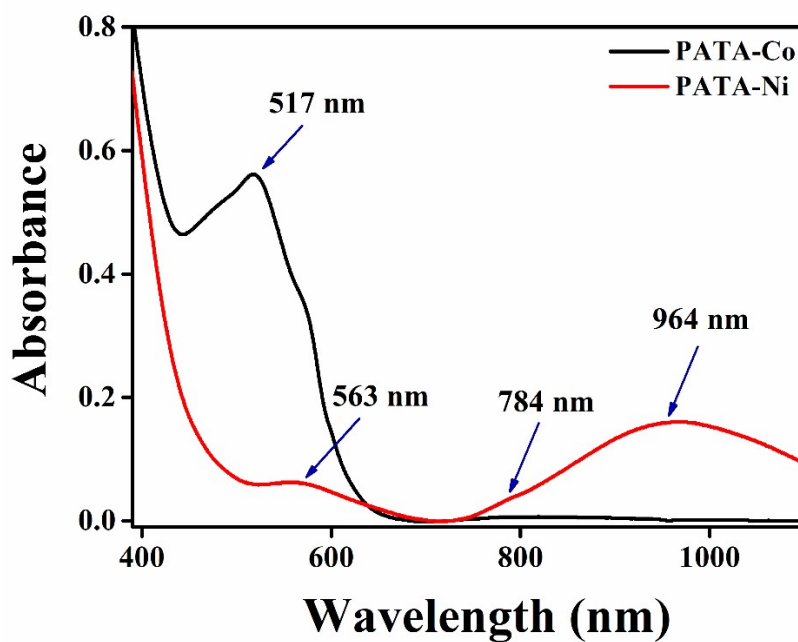

**Fig. S20.** UV-Vis spectra of  $[\text{Co}(\text{PATA})]^{2+}$  and  $[\text{Ni}(\text{PATA})]^{2+}$ , were recorded at  $10 \text{ mM}$  concentration in an aqueous medium containing  $20 \text{ mM}$  HEPES and  $100 \text{ mM}$  NaCl at room temperature.

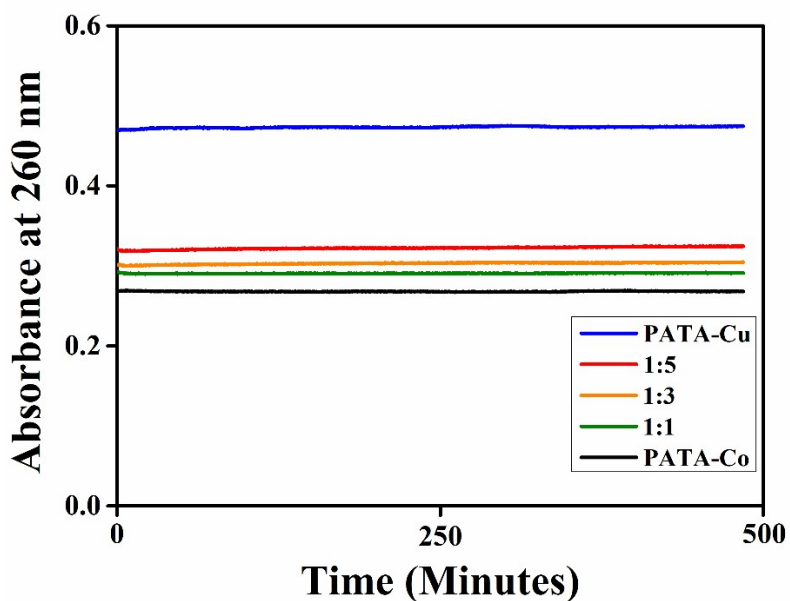

**Fig. S21.** Metal displacement reaction of the  $[\text{Co}(\text{PATA})]^{2+}$  complex with competing  $\text{Cu}(\text{II})$  ions, monitored for 8 hours at 260 nm. Samples containing  $50 \mu\text{M}$   $[\text{Co}(\text{PATA})]^{2+}$  with 1, 2, and 5 equivalent ratios of  $\text{CuCl}_2$  salt in aqueous solutions containing 20 mM HEPES and 100 mM NaCl buffered at pH 7.4. A  $50 \mu\text{M}$   $[\text{Cu}(\text{PATA})]^{2+}$  sample is present to determine the absorbance of a 100% dissociation.

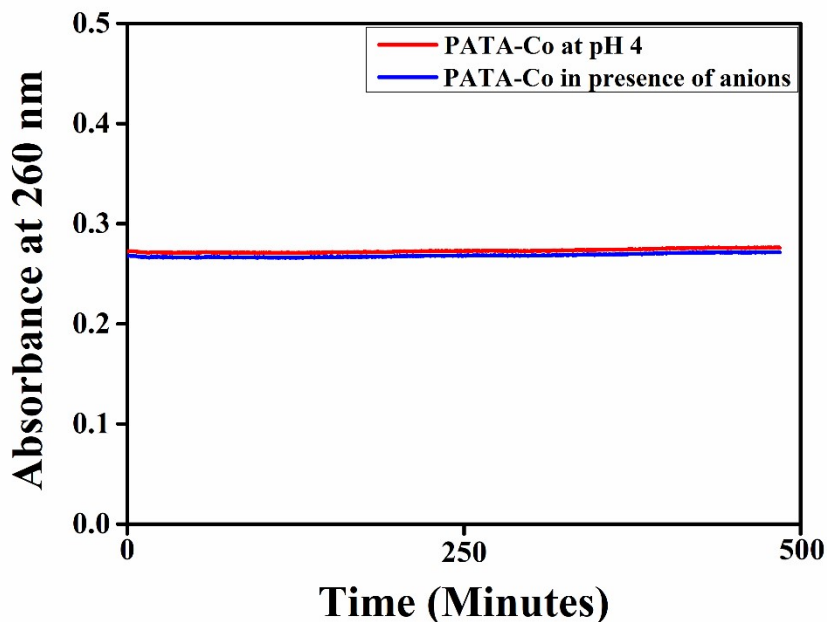

**Fig. S22.** UV-Vis kinetic study of the complex  $[\text{Co}(\text{PATA})]^{2+}$  at 260 nm in acidic conditions, pH 4, and in the presence of competing anions, 25 mM  $\text{K}_2\text{CO}_3$  and 0.4 mM  $\text{K}_2\text{HPO}_4$ .



|  |  |  |  |
|--|--|--|--|
|  |  |  |  |
|  |  |  |  |
